# Supplementary material for: Significant promotion effects of Ag oxide towards Pd catalysis for ethanol and methanol oxidation reactions
Source: Royal Society of Chemistry journal article supplement (doi:10.1039/d0nj00237b), 2020-01-01
Supplement: d0nj00237b1.pdf [file d0nj00237b1.pdf]

## Supporting Information

### **Significant promotion effects of Ag oxide to Pd catalyst for ethanol and methanol oxidation reactions**

Ruijie Liu, Si Si, Huashuai Hu, Chongbin Wang, Yuanyuan Feng\*

*Key laboratory of Life-organic Analysis, College of Chemistry and Chemical Engineering, Qufu*

*Normal University, Qufu Shandong, 273165, China*

\*Corresponding author: Prof. Yuan-Yuan Feng

E-mail: [yfeng@mail.tsinghua.edu.cn](mailto:yfeng@mail.tsinghua.edu.cn)

**Table. S1** The actual loading and chemical composition of the Pd<sub>m</sub>Ag/C samples

| <b>Samples</b>          | <b>Loading of Pd</b> | <b>Loading of Ag</b> | <b>Atomic Pd/Ag ratio</b> |
|-------------------------|----------------------|----------------------|---------------------------|
| Pd <sub>0.05</sub> Ag/C | 0.43%                | 8.78%                | 0.049                     |
| Pd <sub>0.1</sub> Ag/C  | 0.87%                | 8.46%                | 0.104                     |
| Pd <sub>0.5</sub> Ag/C  | 4.43%                | 8.74%                | 0.514                     |
| Pd <sub>1.0</sub> Ag/C  | 8.76%                | 8.98%                | 0.988                     |
| Pd/C                    | 8.93%                | 0                    |                           |
| Ag/C                    | 0                    | 9.02%                |                           |

**Table. S2** Comparison of the catalytic activity of Pd<sub>0.5</sub>Ag/C, PtRu/C and the AgPd catalysts previously reported in literature

| Catalyst                             | Electrolyte                                        | Current density<br>(mA mg <sup>-1</sup> <sub>Pd</sub> ) | Reference |
|--------------------------------------|----------------------------------------------------|---------------------------------------------------------|-----------|
| Pd <sub>0.5</sub> Ag/C               | 0.5 M KOH + 2.0 M C <sub>2</sub> H <sub>5</sub> OH | 8688                                                    | This work |
|                                      | 0.5 M KOH + 2.0 M CH <sub>3</sub> OH               | 2475                                                    |           |
| Pt <sub>1</sub> Ru <sub>1</sub> /C   | 1.0 M KOH + 1.0 M C <sub>2</sub> H <sub>5</sub> OH | 3731                                                    | 1         |
| Pd <sub>50</sub> Ag <sub>50</sub>    | 1.0 M KOH + 1.0 M C <sub>2</sub> H <sub>5</sub> OH | 1970                                                    | 2         |
| Pd-Ag/G                              | 1.0 M KOH + 1.0 M C <sub>2</sub> H <sub>5</sub> OH | 5200                                                    | 3         |
| Pd <sub>1</sub> Ag <sub>3</sub> -HNs | 1.0 M KOH + 1.0 M C <sub>2</sub> H <sub>5</sub> OH | 1615.9                                                  | 4         |
| Pd/Ag-BP-30%                         | 1.0 M KOH + 1.0 M C <sub>2</sub> H <sub>5</sub> OH | 6410.8                                                  | 5         |
| Pd-Ag/GNs                            | 1.0 M KOH + 1.0 M CH <sub>3</sub> OH               | 595                                                     | 6         |
| Pd-Ag(1:1)/RGO                       | 1.0 M KOH + 1.0 M C <sub>2</sub> H <sub>5</sub> OH | 1601                                                    | 7         |
|                                      | 1.0 M KOH + 1.0 M CH <sub>3</sub> OH               | 630                                                     |           |

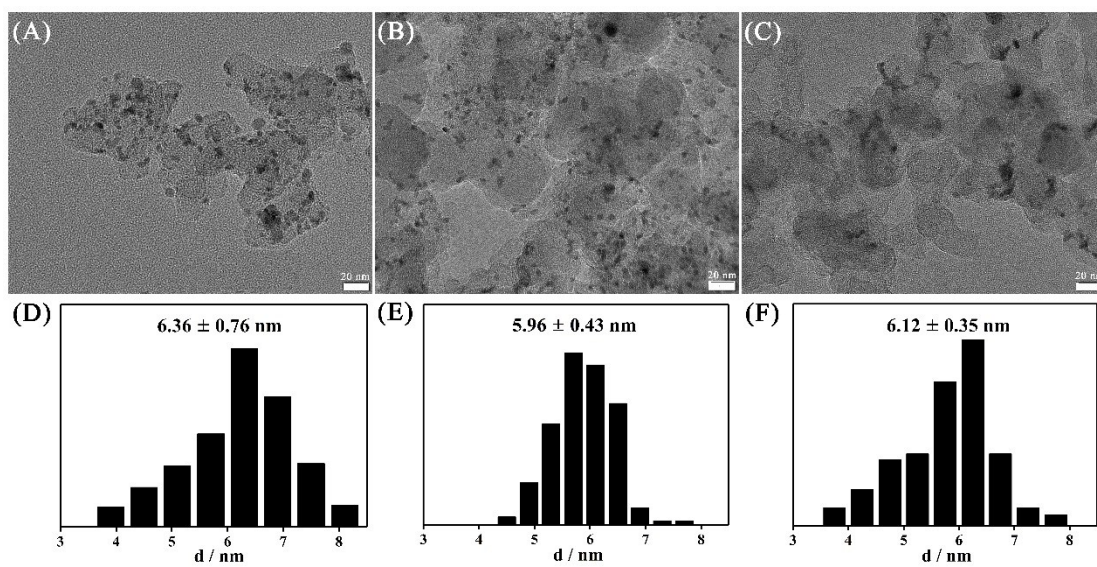

**Figure. S1** TEM images of (A)Pd<sub>0.05</sub>Ag/C, (B)Pd<sub>0.1</sub>Ag/C and (C)Pd<sub>1.0</sub>Ag/C samples. (D-F) show the corresponding size histograms for the metal particles.

**Figure. S2** CV curves of Pd<sub>0.5</sub>Ag/C and Pd/C electrocatalysts in 0.5 M KOH. The potential range was -1.0 ~ 0.5 V (A) and -1.0 ~ 0.1 V (B).

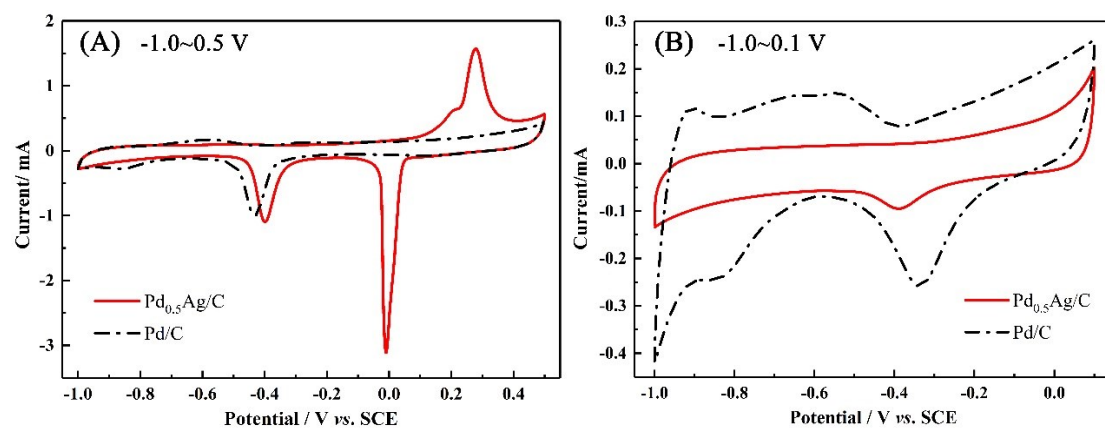

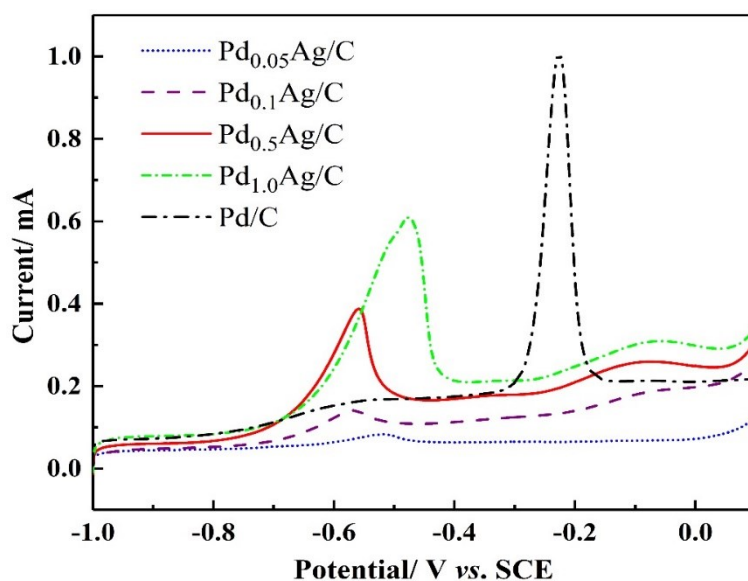

**Figure. S3** CO stripping voltammograms of Pd<sub>m</sub>Ag/C and Pd/C catalysts in 0.5 M KOH, scan rate 50 mV s<sup>-1</sup>

## References:

1. Z. Gu, S. Li, Z. Xiong, H. Xu, F. Gao and Y. Du, *J. Colloid Interface Sci.*, 2018, **521**, 111-118.
2. S. Fu, C. Zhu, D. Du and Y. Lin, *ACS Appl. Mater. Interfaces.*, 2015, **7**, 13842-13848.
3. A. S. Douk, H. Saravani, M. Farsadrooh and M. Noroozifar, *Ultrason. Sonochem.*, 2019, **58**, 104616.
4. D. Bin, B. Yang, K. Zhang, C. Wang, J. Wang, J. Zhong, Y. Feng, J. Guo and Y. Du, *Chem. - Eur. J.*, 2016, **22**, 16642-16647.
5. T. Wu, Y. Ma, Z. Qu, J. Fan, Q. Li, P. Shi, Q. Xu and Y. Min, *ACS Appl. Mater. Interfaces*, 2019, **11**, 5136-5145.
6. Z. Li, L. Ye, Y. Wang, S. Xu, F. Lei and S. Lin, *RSC Advances*, 2016, **6**, 79533-79541.
7. L. Li, M. Chen, G. Huang, N. Yang, L. Zhang, H. Wang, Y. Liu, W. Wang and J. Gao, *J. Power Sources*, 2014, **263**, 13-21.
